# Supplementary material for: Repeated photoswitching performance of azobenzenes adsorbed on gold surfaces: a balance between space, intermolecular interactions, and phase separation
Source: Royal Society of Chemistry journal article supplement (doi:10.1039/c6nj03121h), 2017-01-01
Supplement: c6nj03121h1.pdf [file c6nj03121h1.pdf]

Electronic Supplementary Information (ESI)

**Repeated photoswitching performance of azobenzenes adsorbed on gold surfaces: A balance between space, intermolecular interactions, and phase separation**

Mitsuyuki Kaneta,<sup>a</sup> Takumu Honda,<sup>a</sup> Ken Onda,<sup>b,c</sup> and Mina Han<sup>\*a,d</sup>

---

<sup>a</sup> *Department of Chemistry and Department of Electronic Chemistry, Tokyo Institute of Technology, 4259 Nagatsuta, Midori-ku, Yokohama 226-8502, Japan.*

<sup>b</sup> *School of Science, Tokyo Institute of Technology, 4259 Nagatsuta, Midori-ku, Yokohama 226-8502, Japan.*

<sup>c</sup> *JST, PRESTO, 4-1-8 Honcho, Kawaguchi 332-0012, Japan*

<sup>d</sup> *Department of Chemistry and Biotechnology, Tottori University, 4-101 Koyama Minami, Tottori 680-8552, Japan.*

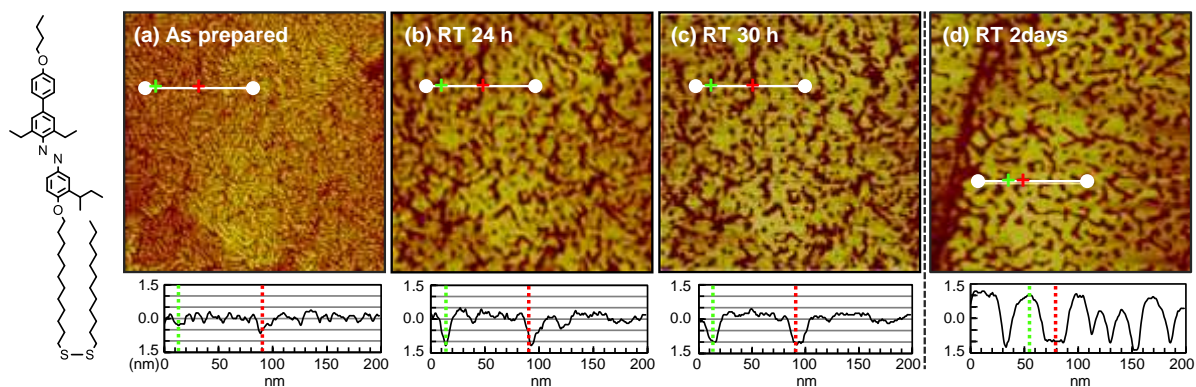

**Figure S1** (a)-(c) AFM images and height profiles continuously monitored without changing the position of the Et-SS (ortho-alkylated azobenzene) sample for 30 hours under 18-19 °C and 32-35% relative humidity condition. The height contrast between the brighter and darker regions becomes more pronounced as small worm-like domains merge with each other. (d) AFM image of phase-separated Et-SS SAMs on an Au(111) surface after dark incubation for 2 days.

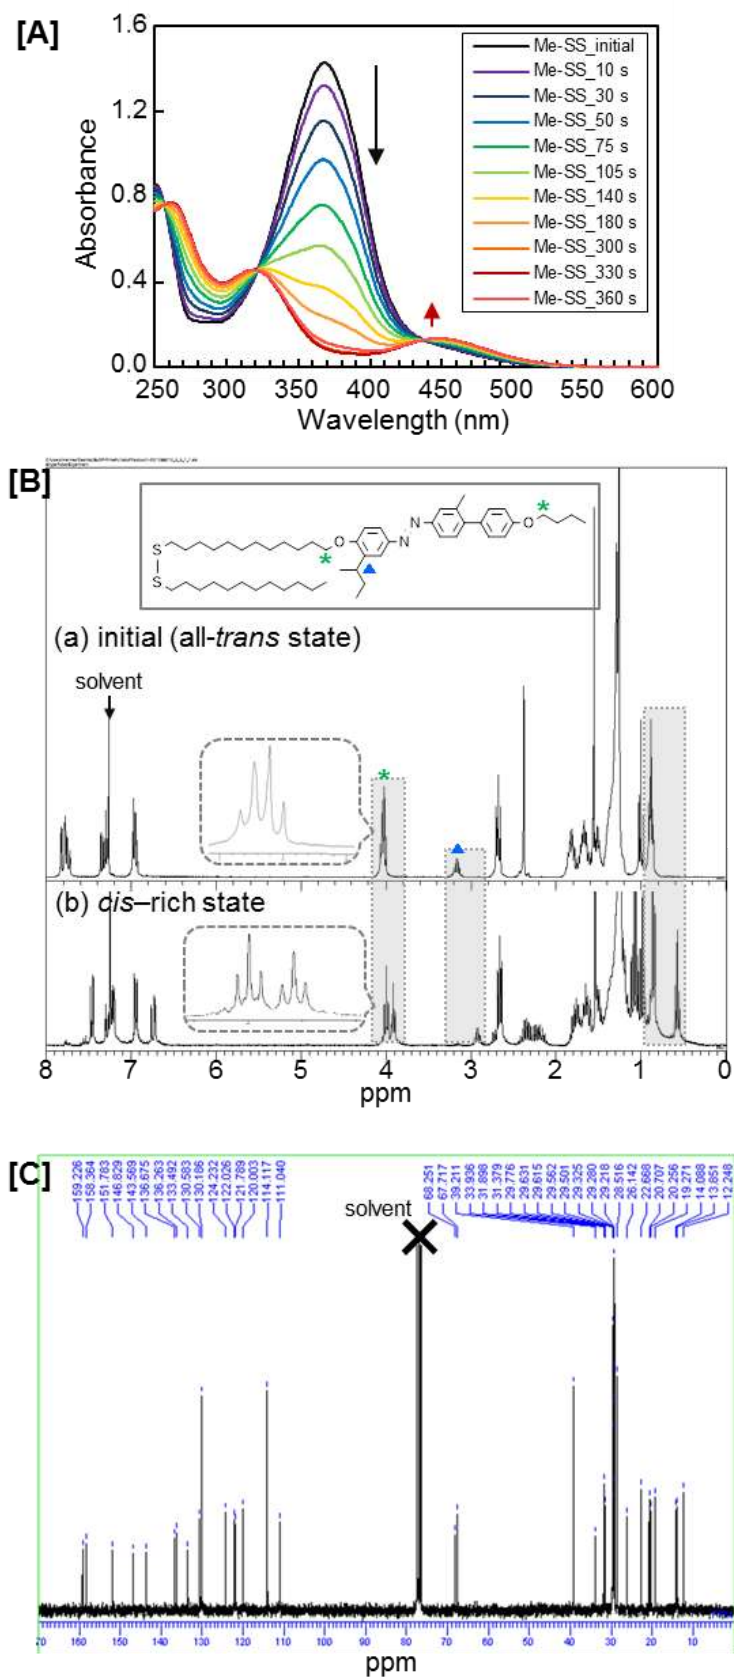

**Figure S2** [A] UV-vis absorption spectral changes of Me-SS in dichloromethane solution as a function of exposure time of 365-nm light ( $\sim 0.3 \text{ mW/cm}^2$ ). [B]  $^1\text{H}$  NMR spectral changes of Me-SS in  $\text{CDCl}_3$  before (initial: all-*trans* state) and after (*cis*-rich state) UV light irradiation. [C]  $^{13}\text{C}$  NMR spectrum of all-*trans* Me-SS in  $\text{CDCl}_3$ .

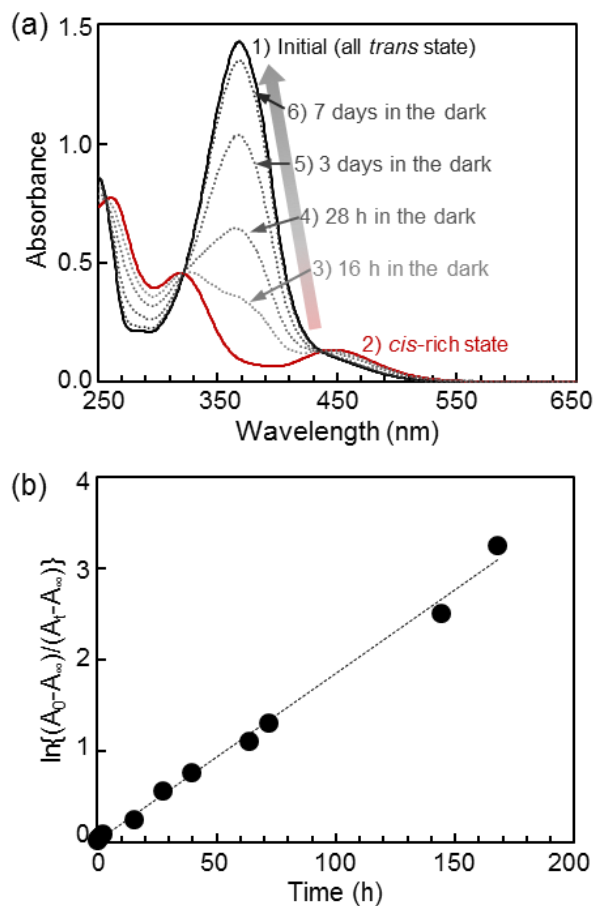

**Figure S3** (a) Absorption spectral changes of Me-SS SAMs as a function of thermal *cis*-to-*trans* isomerization time after 365-nm light. (b) First-order plot for thermal *cis*-to-*trans* isomerization of Me-SS in dichloromethane. The first-order rate constant of Me-SS was found to be approximately  $0.018 \text{ h}^{-1}$ .

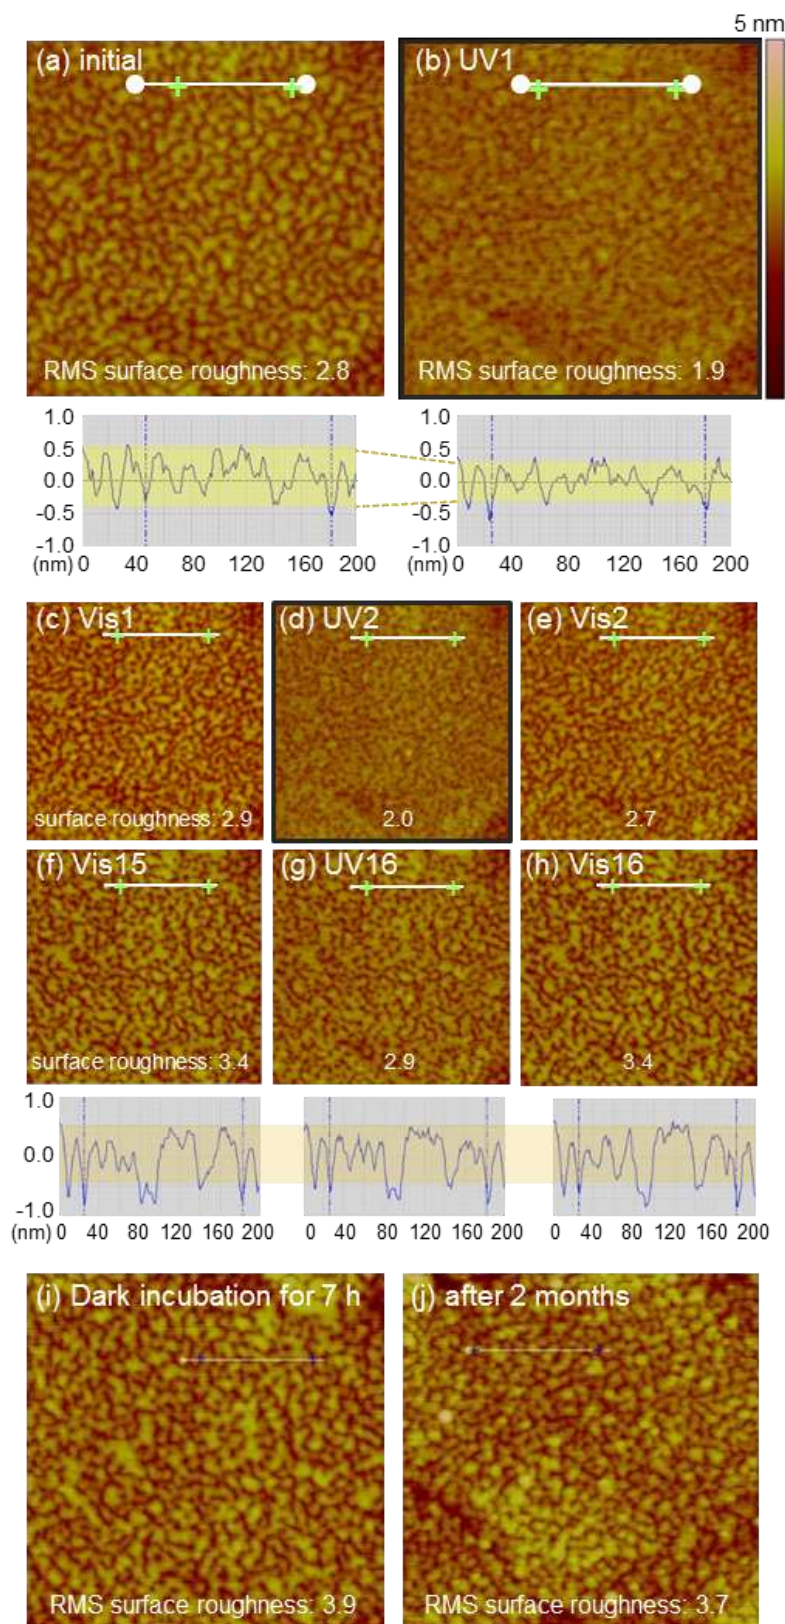

**Figure S4** AFM topographic images, height profiles, root mean-square (RMS) surface roughness values (Å) of Me-SS SAMs on an Au(111) surface as a function of alternating irradiation with 365-nm and 436-nm light. The dimension of the respective images (a-h) is  $400 \times 400 \text{ nm}^2$ . The respective RMS surface roughness values (Å) were calculated on the flat area of  $100 \times 100 \text{ nm}^2$ .
